# Supplementary material for: CriSNPr, a single interface for the curated and de novo design of gRNAs for CRISPR diagnostics using diverse Cas systems
Source: eLife journal article supplement (doi:10.7554/elife.77976), 2023-02-08
Supplement: supp [file elife-77976-supp-v1.zip]

Enter the Genomic Sequence(length : 20 to 30 bp)

GCACCGACCGGGAGCACACGTGG

Position

5 ▾

Type of Mutation

G ▾

Organism

Homo Sapiens ▾

CLEAR

SEARCH

Organism : *Homo sapiens*

rsID : > C19342621G

Alleles : C>G

Position : chr1:19342621  
(GRCh38.p13)

Gene : CAPZB

Disease : Not available

Fn/enFnCas9

AaCas12b

LbCas12a

Cas14a

Cas14a/ssDNA

LwCas13a

sgRNA

| crRNA Sequence                                   | Wt Sequence             | crRNA Position         | Strand | Variation | Cas system  | Off-Targets                           |
|--------------------------------------------------|-------------------------|------------------------|--------|-----------|-------------|---------------------------------------|
| AC <b>G</b> GACCGGGAGCACACGTG <b>GGG</b>         | ACCGACCGGGAGCACACGTGGGG | chr1:19342619-19342641 | fw     | C>G       | Fn/enFnCas9 | <a href="#">Click for Off-targets</a> |
| CAC <b>G</b> GACCGGGAGCACACGT <b>GGG</b>         | CACCGACCGGGAGCACACGTGGG | chr1:19342618-19342640 | fw     | C>G       | Fn/enFnCas9 | <a href="#">Click for Off-targets</a> |
| ATGTGGCTGTGCAC <b>G</b> GAC <b>GG</b> <b>GGA</b> | ATGTGGCTGTGCACCGACCGGGA | chr1:19342607-19342629 | fw     | C>G       | enFnCas9    | <a href="#">Click for Off-targets</a> |
| <b>GG</b> AC <b>G</b> GACCGGGAGCACACG <b>TGG</b> | GCACCGACCGGGAGCACACGTGG | chr1:19342617-19342639 | fw     | C>G       | Fn/enFnCas9 | <a href="#">Click for Off-targets</a> |
| GCAC <b>G</b> GACCGGGAGCACACG <b>TGG</b>         | GCACCGACCGGGAGCACACGTGG | chr1:19342617-19342639 | fw     | C>G       | Fn/enFnCas9 | <a href="#">Click for Off-targets</a> |
| <b>CG</b> GA <b>G</b> CGGGAGCACACGTGG <b>GGG</b> | CCGACCGGGAGCACACGTGGGGG | chr1:19342620-19342642 | fw     | C>G       | Fn/enFnCas9 | <a href="#">Click for Off-targets</a> |
