# Supplementary material for: CriSNPr, a single interface for the curated and de novo design of gRNAs for CRISPR diagnostics using diverse Cas systems
Source: eLife journal article supplement (doi:10.7554/elife.77976), 2023-02-08
Supplement: supp [file Figure 1 - source data 1.xlsx]

## Sheet: Sheet1
Cas effector	PAM/PFS	Spacer Length (bp)	Cleavage target	Mismatch sensitive positions (From PAM)
LwCas13a	NA*	22-28	RNA	3&4, 3&5
LbCas12a	TTTN	16-18	ssDNA/dsDNA	1st -7th
Cas14a	NA	20	ssDNA/dsDNA*	11&12, 12
AaCas12b	TTN	20	ssDNA/dsDNA	1&4, 1&5, 4&11, 4&16, 5&8, 5&11, 16&19, *
FnCas9	NGG	20	dsDNA	2&6, 16&19,
enFnCas9	NGG/NRG or NGR	20	dsDNA	2&6, 16&19, 17, 18, 19
