# Supplementary material for: CriSNPr, a single interface for the curated and de novo design of gRNAs for CRISPR diagnostics using diverse Cas systems
Source: eLife journal article supplement (doi:10.7554/elife.77976), 2023-02-08
Supplement: supp [file Figure 5—figure supplement 2—source data 1.docx]

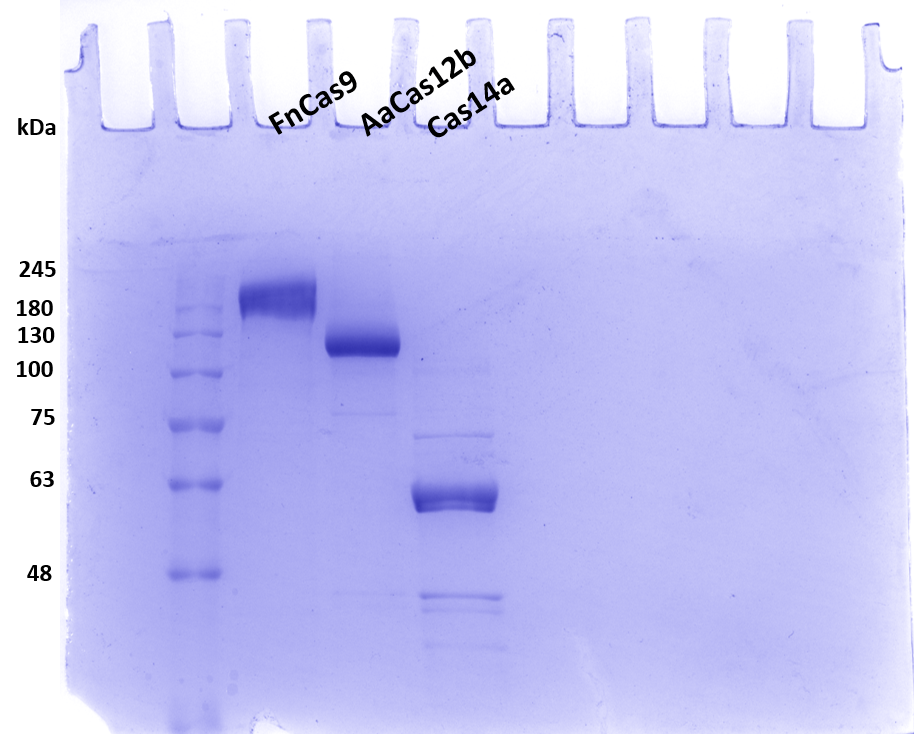


Source Data-1, Figure 5—figure supplement 2. The red rectangle denotes the approximate area cropped for generating Figure 5—figure supplement 2.
