# Supplementary material for: CriSNPr, a single interface for the curated and de novo design of gRNAs for CRISPR diagnostics using diverse Cas systems
Source: eLife. 2023 Feb 8;12:e77976. doi: 10.7554/eLife.77976 (PMC9940907; doi:10.7554/eLife.77976)
Supplement: Supplementary file 4. [file elife-77976-supp4.xlsx]

## Sheet: Sheet1
List of the oligos used in this study
Sl. No.	Name	Sequence	Discription	Used in Fig.	Assay type
1	E484K_Fn_Cr2A&6_FP	TAATACGACTCACTATAGACACCTTGTAATGGAGTTAAGTTTCAGTTGCTGAATTAT	SARS-CoV-2 E484K crRNA IVT oligo for FnCas9	5	FnCas9
2	E484K_Fn_Cr2A&6_RP	ATAATTCAGCAACTGAAACTTAACTCCATTACAAGGTGTCTATAGTGAGTCGTATTA	SARS-CoV-2 E484K crRNA IVT oligo for FnCas9	5	FnCas9
3	CoV2_S_E484K_FP	(Btn)CTATCAGGCCGGTAGCACAC	5' Biotinylated RT-PCR primer for E484K_Fn_Cr2A&6 target (454bp amplicon)	5	FnCas9
4	CoV2_S_E484K_RP	(Btn)AGCAACAGGGACTTCTGTGC	5' Biotinylated RT-PCR primer for E484K_Fn_Cr2A&6 target (454bp amplicon)	5	FnCas9
5	FnCas9_Syn_tracrRNA	G*U*AAUUAAUGCUCUGUAAUCAUUUAAAAGUAUUUUGAACGGACCUCUGUUUGACACGUC*U*U	Synthetic tracrRNA Phosphorothioate end protected (*) and FAM at 3'	5,6a	FnCas9
6	rs2073874_Fn_Cr2&6_FP	TAATACGACTCACTATAGCCAGCTCTTGCAGATGAACCGTTTCAGTTGCTGAATTAT	Human rs2073874 crRNA 2&6 IVT oligo for FnCas9	6a	FnCas9
7	rs2073874_Fn_Cr2&6_RP	ATAATTCAGCAACTGAAACGGTTCATCTGCAAGAGCTGGCTATAGTGAGTCGTATTA	Human rs2073874 crRNA 2&6 IVT oligo for FnCas9	6a	FnCas9
8	rs2073874_Fn_Cr16&19_FP	TAATACGACTCACTATAGCATCATCTGCAAGAGCTGGAGTTTCAGTTGCTGAATTAT	Human rs2073874 crRNA 16&19 IVT oligo for FnCas9	6a	FnCas9
9	rs2073874_Fn_Cr16&19_RP	ATAATTCAGCAACTGAAACTCCAGCTCTTGCAGATGATGCTATAGTGAGTCGTATTA	Human rs2073874 crRNA 16&19 IVT oligo for FnCas9	6a	FnCas9
10	rs138739292_Fn_Cr2&6_FP	TAATACGACTCACTATAGAAGGAACATGGTTAAGAAACGTTTCAGTTGCTGAATTAT	Human rs138739292 crRNA 2&6 IVT oligo for FnCas9	6a	FnCas9
11	rs138739292_Fn_Cr2&6_RP	ATAATTCAGCAACTGAAACGTTTCTTAACCATGTTCCTTCTATAGTGAGTCGTATTA	Human rs138739292 crRNA 2&6 IVT oligo for FnCas9	6a	FnCas9
12	rs2073874Wt_FnTar_FP	TGTTGAAGTTCTTGGGGCTGTCCACCTTGTAGTTGCCGTTGAAGAAGTAGTAGCCAGCTTCGTCTGCAA	Synthetic DNA oligos containing rs2073874 WT allele	6a	FnCas9
13	rs2073874Wt_FnTar_RP	CCAGTTTGGCCTTTTGTGACCGGCGGCTTTGCCCTTCCAGCTCTTGCAGACGAAGCTGGCTACTACTTC	Synthetic DNA oligos containing rs2073874 WT allele	6a	FnCas9
14	rs2073874Mut_FnTar_FP	TGTTGAAGTTCTTGGGGCTGTCCACCTTGTAGTTGCCGTTGAAGAAGTAGTAGCCAGCTTCATCTGCAA	Synthetic DNA oligos containing rs2073874 Mut. allele	6a	FnCas9
15	rs2073874Mut_FnTar_RP	CCAGTTTGGCCTTTTGTGACCGGCGGCTTTGCCCTTCCAGCTCTTGCAGATGAAGCTGGCTACTACTTC	Synthetic DNA oligos containing rs2073874 Mut. allele	6a	FnCas9
16	rs138739292Wt_FnTar_FP	CTGACAGGGCATATCAGTCAACTGACTGAAGAGAAGAATGACTTAAGGAACATGGTTATGAAGCTGGAA	Synthetic DNA oligos containing rs138739292 WT allele	6a	FnCas9
17	rs138739292Wt_FnTar_RP	TATCTCTACCAGCTCCTGTCTGTCGATACCACCTGATCTGCTCTTCCAGCTTCATAACCATGTTCCTTA	Synthetic DNA oligos containing rs138739292 WT allele	6a	FnCas9
18	rs138739292Mut_FnTar_FP	CTGACAGGGCATATCAGTCAACTGACTGAAGAGAAGAATGACTTAAGGAACATGGTTATGAAACTGGAA	Synthetic DNA oligos containing rs138739292 Mut. allele	6a	FnCas9
19	rs138739292Mut_FnTar_RP	TATCTCTACCAGCTCCTGTCTGTCGATACCACCTGATCTGCTCTTCCAGTTTCATAACCATGTTCCTTA	Synthetic DNA oligos containing rs138739292 Mut. allele	6a	FnCas9
20	rs2073874_FB	(Btn)TGTTGAAGTTCTTGGGGCTGT	5' Biotinylated PCR primer for rs2073874	6a	FnCas9
21	rs2073874_RB	(Btn)CCAGTTTGGCCTTTTGTGACC	5' Biotinylated PCR primer for rs2073874	6a	FnCas9
22	rs138739292_FB	(Btn)CTGACAGGGCATATCAGTCAACT	5' Biotinylated PCR primer for rs138739292	6a	FnCas9
23	rs138739292_RB	(Btn)TATCTCTACCAGCTCCTGTCTGT	5' Biotinylated PCR primer for rs138739292	6a	FnCas9
24	Cas14a_UniCr_FP	TAATACGACTCACTATAGTTCACTGATAAAGTGGAGAACCGCTTCACCAAAAGCTGTCCCTTAGGGGATTAGAACTTGAGTGAAGGTGGGCTGCTTGCATCAGCCTAA	SARS-CoV-2 E484K gRNA IVT oligo for Cas14a	5,6c	Cas14a
25	Cas14a_E484K_12_RP	GTAATGGTGTTAAAGGTTTTGTTGCATTCCTTCATTCTTTCAAATGAATTTGTTTCGAGGGTTACTTTCCGAAGAAAGCACTTCTCGACATTAGGCTGATGCAAGCAGCCCACC	SARS-CoV-2 E484K gRNA IVT oligo for Cas14a	5	Cas14a
26	Cas14a_ssDNA_FQ	5’-FAM-TTTTTTTTTTTT-BHQ1-3’	5' FAM and 3' BHQ1 labelled poly-T (12nt) ssDNA reporter for Cas14a	5,6c	Cas14a
27	rs2073874_Cas14a12_RP	GCTCTTGCAGATGAAGCTGGGTTGCATTCCTTCATTCtttcAAATGAATTTGTTTCGAGGGTTACTTTCCGAAGAAAGCACTTCTCGACATTAGGCTGATGCAAGCAGCCCACC	Human rs2073874 gRNA IVT oligo for Cas14a	6c	Cas14a
28	rs138739292_Cas14a12_RP	ATGGTTATGAAACTGGAAGAGTTGCATTCCTTCATTCtttcAAATGAATTTGTTTCGAGGGTTACTTTCCGAAGAAAGCACTTCTCGACATTAGGCTGATGCAAGCAGCCCACC	Human rs138739292 gRNA IVT oligo for Cas14a	6c	Cas14a
29	rs2073874_ssDNA_wt_fw	CGGCGGCTTTGCCCTTCCAGCTCTTGCAGACGAAGCTGGCTACTACTTCTTCAACGGCAA	ssDNA 60 nt target rs2073874 WT allelic sequence for Cas14a	6c	Cas14a
30	rs2073874_ssDNA_mut_fw	CGGCGGCTTTGCCCTTCCAGCTCTTGCAGATGAAGCTGGCTACTACTTCTTCAACGGCAA	ssDNA 60 nt target rs2073874 Mut. allelic sequence for Cas14a	6c	Cas14a
31	rs138739292_ssDNA_wt_fw	GAAGAATGACTTAAGGAACATGGTTATGAAGCTGGAAGAGCAGATCAGGTGGTATCGACA	ssDNA 60 nt target rs138739292 WT allelic sequence for Cas14a	6c	Cas14a
32	rs138739292_ssDNA_mut_fw	GAAGAATGACTTAAGGAACATGGTTATGAAACTGGAAGAGCAGATCAGGTGGTATCGACA	ssDNA 60 nt target rs138739292 Mut. allelic sequence for Cas14a	6c	Cas14a
33	ssDNA_E484K_wt	TCAGGCCGGTAGCACACCTTGTAATGGTGTTGAAGGTTTTAATTGTTACTTTCCTTTACA	ssDNA 60 nt target WT SARS-CoV-2 sequence for AaCas12b/Cas14a	5	AaCas12b/Cas14a
34	ssDNA_E484K_mut	TCAGGCCGGTAGCACACCTTGTAATGGTGTTAAAGGTTTTAATTGTTACTTTCCTTTACA	ssDNA 60 nt target E484K SARS-CoV-2 sequence for AaCas12b/Cas14a	5	AaCas12b/Cas14a
35	Cas12b_UniCr_FP	TAATACGACTCACTATAGTCTAAAGGACAGAATTTTTCAACGGGTGTGCCAATGGCCACTTTCCAGGTGGCAAAGCCCGTTG	SARS-CoV-2 E484K gRNA IVT oligo for AaCas12b	5,6d	AaCas12b
36	Cas12b_E484K_4n11_RP	TAAAACCTTTAACACCTTTAGTGCCACTTCGCTTGAAGTTCAACGGGCTTTGCCACCTGG	SARS-CoV-2 E484K gRNA IVT oligo for AaCas12b	5	AaCas12b
37	Cas12b_ssDNA_FQ	5’-FAM-TTTTT-BHQ1-3’	5' FAM and 3' BHQ1 labelled poly-T (5nt) ssDNA reporter for AaCas12b	5,6d	AaCas12b
38	rs2073874_ssDNA_wt_rev	TTGCCGTTGAAGAAGTAGTAGCCAGCTTCGTCTGCAAGAGCTGGAAGGGCAAAGCCGCCG	ssDNA 60 nt target rs2073874 WT allelic sequence for AaCas12b	6d	AaCas12b
39	rs2073874_ssDNA_mut_rev	TTGCCGTTGAAGAAGTAGTAGCCAGCTTCATCTGCAAGAGCTGGAAGGGCAAAGCCGCCG	ssDNA 60 nt target rs2073874 Mut. allelic sequence for AaCas12b	6d	AaCas12b
40	rs138739292_ssDNA_wt_rev	TGTCGATACCACCTGATCTGCTCTTCCAGCTTCATAACCATGTTCCTTAAGTCATTCTTC	ssDNA 60 nt target rs138739292 WT allelic sequence for AaCas12b	6d	AaCas12b
41	rs138739292_ssDNA_mut_rev	TGTCGATACCACCTGATCTGCTCTTCCAGTTTCATAACCATGTTCCTTAAGTCATTCTTC	ssDNA 60 nt target rs138739292 Mut. allelic sequence for AaCas12b	6d	AaCas12b
42	rs2073874_ Cas12b1n5_RP	GTAGTAGCCAGCTTCATCTCGTGCCACTTCGCTTGAAGTTCAACGGGCTTTGCCACCTGG	Human rs2073874 gRNA 1&5 IVT oligo for AaCas12b	6d	AaCas12b
43	rs2073874_ Cas12b5n11_RP	GTAGTAGCCTGCTTCATCTGGTGCCACTTCGCTTGAAGTTCAACGGGCTTTGCCACCTGG	Human rs2073874 gRNA 5&11 IVT oligo for AaCas12b	6d	AaCas12b
